# Supplementary material
Source: publisher figshare collection journal article supplement (https://karger.figshare.com/articles/dataset/_/5103856)
Supplement: Supplementary file 1 [file 1]

**Supplementary Table 1.** Distribution of risk factors classified by risk group

|                        | Low risk    | High risk  |
|------------------------|-------------|------------|
| Risk factors, n        | 0–2         | 3          |
| Patients, n (%)        | 76 (89.4 %) | 9 (10.6 %) |
| Age, <73 years, n (%)  | 31 (67.4%)  | 9 (10.6 %) |
| PSA, <270 ng/mL, n (%) | 34 (73.9%)  | 9 (10.6 %) |
| BSI, >2.7 %, n (%)     | 34 (73.9%)  | 9 (10.6 %) |

PSA; prostate-specific antigen, BSI; bone scan index
